# Supplementary material
Source: publisher figshare collection journal article supplement (https://acs.figshare.com/ndownloader/files/5740317)

The Stereochemistry of the Thermal Cheletropic Decarbonylation of 3-Cyclopentenone as  
Determined by Multiphoton Infrared Photolysis/Thermolysis

**Supporting Information**

Gregory R. Unruh and David M. Birney\*

Department of Chemistry and Biochemistry, Texas Tech University, Lubbock, Texas

David.Birney@ttu.edu

**Experimental**

NMR spectra were obtained either on an IBM AF-200 or AF-300 spectrometer in acetone- $d_6$  ( $^1H$  at 200 MHz, and  $^{13}C$  at 50 MHz) using acetone- $d_5$  as an internal standard (2.06 ppm) unless otherwise noted.  $^1H - ^{13}C$  HETCOR spectra were obtained on the AF-300 for **9c** and **12c**. Chemical shifts are reported in ppm, couplings in Hz. Infrared spectra were measured as neat films on a Perkin-Elmer 1600 Series FTIR. Analytical gas chromatography (GC) was performed on a Hewlett-Packard 5890 gas chromatograph equipped with both flame ionization and thermal conductivity. Stationary phases were either Carbowax 6000 or Carbowax 80/120. THF was distilled from Na prior to use. Preparative GC was performed using a Gow-Mac Model 550 GC, with 20% Carbowax 20M columns. Pentane and HMPA were distilled from  $CaH_2$  prior to use. Other reagents were used as received. All reactions were run under nitrogen. Products were purified by flash chromatography on silica gel, neutral alumina or florisil with eluents as noted.

Flash vacuum pyrolysis (FVP) was carried out between 520° C and 580° C at 0.5 torr using a horizontal quartz pyrolysis tube. The reactant was subjected to four freeze-pump-thaw cycles prior to pyrolysis. The pyrolysate was trapped in a cold finger in a dry ice/ether bath at -100° C. The cold finger was warmed to room temperature and the pyrolysate was taken up in 0.5 mL pentane for GC analysis. The isomeric hexadiene products were identified by comparison to commercial samples whose structure and purity were confirmed by  $^1H$  NMR.

Multi-photon Infrared (MPIR) Photolysis/Thermolysis. All of the MPIR experiments were performed using a Lumonics 840 Series infrared laser. This is a transversely excited, atmospheric pressure (TEA) carbon dioxide pulsed laser. The pulse has a 200 ns peak with a low energy tail lasting approximately 4  $\mu s$ . The output is tunable to a variety of carbon dioxide rotational bands

from approximately  $900\text{ cm}^{-1}$  to  $1100\text{ cm}^{-1}$ , with a pulse energy of up to 50 J. The output wavelength was calibrated to the rotational spectrum of carbon dioxide. The pulse power was measured with a Scientech Model 380102 power transducer which also served as a beam stop. The laser pulse was focused through a ZnSe lens (converging, 30.5 cm focal length) at the center of an 11 cm long, 2 cm diameter gas cell with NaCl windows epoxied in place. The cell was charged with **2** using standard vacuum manifold techniques. The cell was transferred from the laser to the IR spectrometer for IR analysis. The product was recovered for GC analysis as described above for FVP.

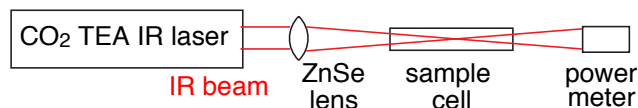

### Preparation of 3-Methyl-4-thianone

A solution of 80 mL of anhydrous THF and 56.11 mL of 2M LDA in THF (112.0 mmol) was cooled to  $-78^{\circ}\text{C}$ . A solution of 4-thianone (**8**, 10.0 g, 86.1 mmol), HMPA (20 g, 112 mmol) and 100 mL of dry THF were added dropwise over 1 hr. The solution was allowed to stir for 20 minutes at  $-78^{\circ}\text{C}$ , then methyl iodide (24.0 g, 169 mmol) in 60 mL of THF was added dropwise over 1 hr. This solution was stirred for 2 hr. at  $-78^{\circ}\text{C}$  and then allowed to warm to room temperature and quenched with 100 mL of saturated  $\text{NH}_4\text{Cl}$ . The organic layer was washed twice with 100 mL saturated  $\text{NH}_4\text{Cl}$ , once with 100 mL pH = 7.00 buffer and dried over anhydrous  $\text{MgSO}_4$ /celite/charcoal for 24 hr. This solution was then filtered, concentrated in vacuo and chromatographed on silica gel using 85:15 pentane:acetone yielding 6.8 g (52.2 mmol, 60.71%) of 3-methyl-4-thianone, as a clear, colorless oil.

**<sup>1</sup>H NMR**  $\delta$  2.97 – 2.67 (m, 4 H), 2.73 – 2.59 (m, 3 H), 1.03 (d,  $J = 6.1\text{ Hz}$ , 3 H).

**IR** 2931, 1709, 1423, 1318, 1243, 1044, 978, 931, 750, 499  $\text{cm}^{-1}$ .

Elemental analysis calc for  $\text{C}_6\text{H}_{10}\text{OS}$ : C 55.35, H 7.74 S 24.63 Found: C 54.94, H 7.67, S 23.98

### Preparation of *cis*- and *trans*-3,5-Dimethyl-4-thianone (**9c**) and (**9t**)

A solution of 80 mL of anhydrous THF and 44.9 mL of 2M LDA in THF (9.59 g, 89.6 mmol) was cooled to  $-78^{\circ}\text{C}$  and a solution of 3-methyl-4-thianone (8.0 g, 61.4 mmol), HMPA (18 g, 100.6 mmol) in 100 mL of dry THF were added dropwise over 1 hr. Addition of methyl iodide (19.2 g, 135.2 mmol) in 60 mL of THF and work up as above gave 5.75 g (39.9 mmol, 64.9%) of a mixture of **9c** and **9t**. These were separated by column chromatography.

**(9c)**  $^1\text{H}$  NMR (300 MHz)  $\delta$  2.93 – 2.87 (d of m,  $J$  = 8.4, 2H), 2.84 – 2.72 (m, 2H), 2.70 – 2.62 (dd,  $J$  = 8.4, 7.5, 2H), 1.01 (d,  $J$  = 6.0 Hz, 6 H). The multiplets at 2.93 – 2.87 and 2.70 – 2.62 were shown to be diastereotopic hydrogens on the same carbon by HETCOR (see supporting information).  $^{13}\text{C}$  (75 MHz) 211.1, 48.7, 38.8, 15.0

Elemental analysis calc for  $\text{C}_7\text{H}_{12}\text{OS}$ : C 58.29, H 8.39, S 22.23, Found: C 59.65, H 8.60, S 19.58

**(9t)**  $^1\text{H}$  NMR 3.10 – 2.55 (m, 6H), 0.98 (d,  $J$  = 6.6 Hz, 6H).

**IR** (**9c** and **9t**) 2978, 2932, 1702, 1454, 1377, 1339, 12989, 1230, 1060, 984, 835, 699  $\text{cm}^{-1}$ .

Preparation of *cis*- and *trans*-6,10-Dimethyl-1,4-dioxo-8-thiaspiro[4.5]decane (**10c**) and (**10t**)

In a flask equipped with a Dean-Stark trap were placed 1.0 g (6.9 mmol) of a mixture of *cis*- and *trans*-3,5-dimethyl-4-thianone (**9c**) and (**9t**), 20 mg of p-TSOH, 0.95 g (17.2 mmol) anhydrous ethylene glycol and 100 mL of anhydrous benzene. After azeotropic removal of water was complete, the reaction was diluted with 100 mL of ether. The ether was filtered, and washed with 2x100 mL 5%  $\text{NaHCO}_3$  and dried for 24 hr. over anhydrous  $\text{MgSO}_4$ /celite/charcoal. The ether was then filtered, concentrated in vacuo and chromatographed on neutral alumina with 95:5 hexane:EtOAc affording 0.8 g of (**10c**) and 0.1 g of (**10t**) (4.8 mmol, 70% overall).

**(10c)**  $^1\text{H}$  NMR  $\delta$  4.02 (s, 4 H), 2.64 (t,  $J$  = 12.2, 2H), 2.34 (d,  $J$  = 12.2, 2H), 1.9 (m, 2H), 0.89 (d,  $J$  = 6.7 Hz, 6H)

**IR** 2964, 1465, 1366, 1223, 954, 740  $\text{cm}^{-1}$ .

Elemental analysis calc for  $\text{C}_9\text{H}_{16}\text{O}_2\text{S}$ : C, 57.41; H, 8.57; O, 16.99; S, 17.03, Found: C 60.82, H 8.82, S 15.56

**(10t)**  $^1\text{H}$  NMR  $\delta$  4.02 (narrow m, 4 H), 2.9 – 2.8 (m, 2H), 2.7 – 2.5 (m, 2H), 2.35 – 2.15 (m, 2H), 0.84 (d,  $J$  = 6.5, 6H).

**IR** 2964, 1466, 1359, 1218, 916, 723, 716  $\text{cm}^{-1}$ .

Preparation of *cis*- and *trans*-6,10-Dimethyl-1,4-dioxo-8-thiaspiro[4.5]decane-8,8-dioxide (**11c**) and (**11d**)

A mixture of 1.0 g (5.3 mmol) of the ketal (**10c**), 25 mL of MeOH, 15 mL  $\text{H}_2\text{O}$  and 3.0 g (14 mmol)  $\text{NaIO}_4$  was stirred for 30 minutes at room temperature, then refluxed for 16 hr. The resulting mixture was cooled, filtered and the excess MeOH/ $\text{H}_2\text{O}$  removed in vacuo. The residue was taken up in 50 mL of  $\text{CHCl}_3$  and filtered a second time to remove the precipitated sodium

iodate. The solids were washed with 50 mL of  $\text{CHCl}_3$  and the combined  $\text{CHCl}_3$  portions were dried for 24 hr over anhydrous  $\text{MgSO}_4$ /celite/charcoal. The solution was filtered and concentrated in vacuo affording a white solid which was recrystallized from 95% ethanol, yielding 0.8 g (**11c**) (3.6 mmol, 68.9%) of white crystals, mp 158-161°C. A similar reaction of 1.0 g (5.3 mmol) **10t** gave **11t** as a white solid which was recrystallized from 100% ethanol-ether (75:25), yielding 0.4 g (1.58 mmol, 34.5%) of white crystals, mp 164-166°C.

**(11c)**  $^1\text{H NMR}$   $\delta$  4.12 (s, 4 H), 3.1 – 2.9 (m, 4 H), 2.5 – 2.3 (m, 2 H) 0.97 (d,  $J$  = 6.7, 6 H).  $^{13}\text{C}$   $\delta$  68.8, 68.0, 56.2, 40.6, 14.3.

**IR** (Diffuse Reflectance) 2964, 1427, 1322, 1144, 916, 602.3  $\text{cm}^{-1}$ .

Elemental Analysis calc for  $\text{C}_9\text{H}_{16}\text{O}_4\text{S}$ : C, 49.07; H, 7.32; O, 29.05; S, 14.56, Found: C 51.06, H 7.11, S 12.40

**(11t)**  $^1\text{H NMR}$   $\delta$  4.13 (m, 4 H), 3.2 – 2.7 (m, 6 H), 0.96 (d,  $J$  = 6.6, 6 H).

**IR** (Diffuse Reflectance) 2952, 1418, 1316, 1138, 915, 600  $\text{cm}^{-1}$ .

#### Preparation of *cis*- and *trans*-1,4-Dioxa-6,9-dimethylspiro[4.4]non-7-ene (**12c**) and (**12t**)

In a flask equipped with a powder addition funnel were placed 1.8 g (8.2 mmol) of **11c**, 149 mL of anhydrous  $\text{CCl}_4$  and 75 mL of anhydrous *t*-BuOH. To this solution, at room temperature, were slowly added 19.8 g (162.4 mmol) of *t*-BuOK via the powder addition funnel, maintaining a temperature of 50°C or below in the reaction vessel. The reaction mixture was then maintained at 50°C in an oil bath for 24 hr, cooled and poured into a 500 mL beaker containing 200 mL of ice water. The aqueous layer was extracted with 3x70 mL ether. The combined ether extracts were washed with 3x70 mL  $\text{H}_2\text{O}$ , 2x70 mL saturated NaCl and 1x70 mL pH = 7.00 buffer and dried for 24 hr over anhydrous  $\text{Na}_2\text{SO}_4$ /celite/charcoal. The ether solution was filtered, concentrated and chromatographed on florisil using 98:2 pentane:ether as eluent affording 1.1 g **12c** (7.1 mmol, 87.3%) as an oil. A similar reaction using 1.8 g **11t** gave 0.83 g **12t** (5.3 mmol, 65.5%) as an oil.

**(12c)**  $^1\text{H NMR}$  (200 MHz)  $\delta$  5.57 (s, 2 H), 3.90 (s, 4 H), 2.63 (q,  $J$  = 7.3 Hz, 2 H) 0.95 (d,  $J$  = 7.3 Hz, 6 H) ppm.

$^{13}\text{C NMR}$  (50 MHz) 134.1, 118.8, 66.0, 64.7, 49.5, 15.6. A HETCOR spectrum (300 and 75 MHz) showed that the  $^{13}\text{C}$  peaks at 66.0 and 64.7 ppm were associated with the  $^1\text{H}$  singlet at 3.90 ppm (see supporting information).

**IR** 2980, 2930, 1644, 1550, 1469, 1365, 1179, 928, 643, 518  $\text{cm}^{-1}$ .

**(12t)**  $^1\text{H NMR}$   $\delta$  5.46 (m, 2 H), 3.90 (m, 4 H), 2.7 (m, 2 H) 0.96 (d,  $J$  = 7.3, 6 H).

### Preparation of *cis*--2,5-Dimethyl-3-cyclopentenone (**4**)

A solution of 1.0 g (6.5 mmol) of the ketal **12c**, 50 mg of pyridinium p-toluenesulfonate, 10 mL of H<sub>2</sub>O and 20 mL of acetone was refluxed for 6 hr, cooled and poured into a 75 mL of saturated NaCl. This solution was extracted with 3x50 mL ether which were combined and washed with 2x50 mL pH = 7.00 buffer. The ether solution was dried for 24 hr over anhydrous MgSO<sub>4</sub>/celite/charcoal, filtered, concentrated and chromatographed on florisil using 98:2 pentane:ether as the eluent. Yield 0.59 g (5.4 mmol, 82.6%) of **4** as a colorless oil. Samples for analysis and for MP-IR and pyrolysis experiments were further purified by preparative GC.

(**4**) <sup>1</sup>H NMR δ 6.00 (s, 2 H), 2.90 (q, J = 7.5 Hz, 2 H) 1.12 (d, J = 7.5 Hz, 6 H).

IR (gas phase) 2980, 2950, 1724, 1587, 1462, 1454, 1376, 1247, 1146, 1005, 895, 711, 700 cm<sup>-1</sup>.

### **Searches of the Cambridge Structural Database.**

The substructure **13** was searched against the Cambridge Structural Database. The only constraints were that C2 and C4 were required to have four bonds and the C2-C3 bond could be either double or aromatic. The structures obtained were then grouped as described in the text, into **13**, **14**, **15**, and **16**. The CSD refcodes and the corresponding distances, angles and dihedral angles are recorded in Table S1, along with the averages for each item. Individual references for these structures can be located through the CSD. The average angles are presented below.

7 compounds

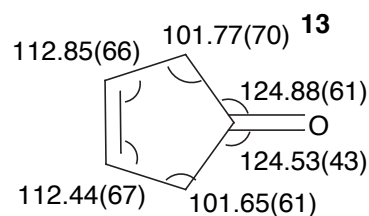

8 compounds

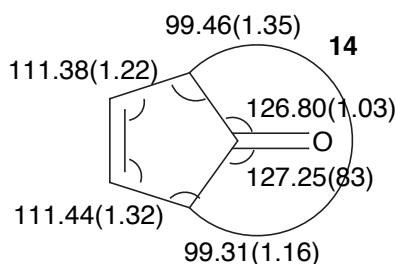

12 compounds

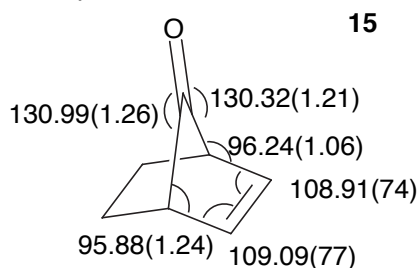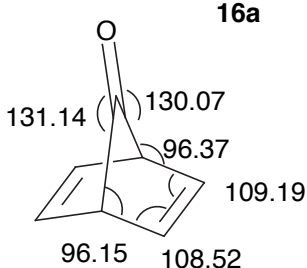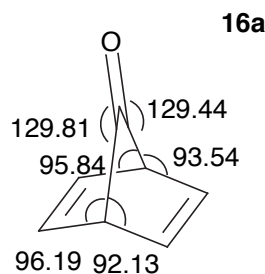

TABLE S1

| <b>Refcode</b>     | <b>ANGLES</b>  |                 |                 |                 |                 |                |
|--------------------|----------------|-----------------|-----------------|-----------------|-----------------|----------------|
|                    | <b>O-C1-C2</b> | <b>C1-C2-C3</b> | <b>C2-C3-C4</b> | <b>C3-C4-C5</b> | <b>C4-C5-C1</b> | <b>C5-C1-O</b> |
| <b>13</b>          |                |                 |                 |                 |                 |                |
| BEMKUZ             | 124.37         | 100.50          | 113.97          | 113.80          | 100.40          | 124.33         |
| CEHBOG             | 125.11         | 101.37          | 112.41          | 112.31          | 102.36          | 125.85         |
| DONKIA             | 124.76         | 102.11          | 112.03          | 112.84          | 101.74          | 124.32         |
| DONKIA             | 123.94         | 101.50          | 112.44          | 112.17          | 102.46          | 125.41         |
| DONKIA10           | 124.74         | 102.06          | 112.06          | 112.85          | 101.71          | 124.31         |
| DONKIA10           | 123.93         | 101.50          | 112.44          | 112.17          | 102.45          | 125.40         |
| RUWRAC             | 124.84         | 102.53          | 111.71          | 113.81          | 101.24          | 124.51         |
| averages           | 124.53         | 101.65          | 112.44          | 112.85          | 101.77          | 124.88         |
| standard deviation | 0.43           | 0.61            | 0.67            | 0.66            | 0.70            | 0.61           |
| combined average   | 124.70         | 101.71          | 112.64          |                 |                 |                |
| <b>14</b>          |                |                 |                 |                 |                 |                |
| ACNPTH             | 126.53         | 98.27           | 112.32          | 112.39          | 98.41           | 126.13         |
| ACNPTH10           | 126.53         | 98.27           | 112.32          | 112.39          | 98.41           | 126.13         |
| BUDECN             | 129.10         | 97.23           | 113.56          | 108.57          | 99.82           | 126.69         |
| EBEQOR             | 126.89         | 100.12          | 109.34          | 112.59          | 97.07           | 128.89         |
| HAJMEK             | 127.38         | 100.54          | 110.20          | 111.75          | 100.95          | 126.33         |
| HAJMEK             | 127.48         | 100.07          | 110.96          | 111.16          | 100.45          | 126.14         |
| MEWYUI             | 126.43         | 100.52          | 112.37          | 111.39          | 101.27          | 125.94         |
| NKAUON             | 127.68         | 99.49           | 110.48          | 110.81          | 99.32           | 128.15         |
| averages           | 127.25         | 99.31           | 111.44          | 111.38          | 99.46           | 126.80         |
| standard deviation | 0.83           | 1.16            | 1.32            | 1.22            | 1.35            | 1.03           |
| combined average   | 127.03         | 99.39           | 111.41          |                 |                 |                |
| <b>15</b>          |                |                 |                 |                 |                 |                |
| BIYWAH             | 128.89         | 93.62           | 110.33          | 110.16          | 94.02           | 128.83         |
| CIQVAZ             | 131.14         | 96.11           | 108.55          | 108.68          | 96.26           | 131.67         |
| DITMOI             | 131.54         | 97.33           | 108.31          | 109.07          | 96.78           | 129.22         |
| ETHPTB             | 129.58         | 96.04           | 108.56          | 108.78          | 96.45           | 130.81         |
| HOXJIN             | 130.10         | 94.60           | 110.73          | 109.93          | 95.09           | 129.63         |
| JITMEE             | 130.99         | 97.71           | 108.56          | 108.71          | 97.73           | 132.13         |
| JITNIJ             | 131.38         | 97.41           | 108.78          | 108.51          | 97.63           | 131.39         |
| KAFBEY             | 129.84         | 95.68           | 108.45          | 109.81          | 96.90           | 131.00         |
| KUBDAM             | 132.49         | 96.93           | 109.00          | 108.67          | 96.92           | 130.27         |
| PIGSED             | 130.34         | 95.06           | 108.68          | 108.96          | 94.95           | 129.96         |
| TIBGUG             | 132.15         | 94.55           | 109.87          | 107.33          | 96.36           | 131.04         |
| ZEBXOT             | 133.44         | 95.49           | 109.24          | 108.31          | 95.83           | 127.85         |
| averages           | 130.99         | 95.88           | 109.09          | 108.91          | 96.24           | 130.32         |
| standard deviation | 1.26           | 1.24            | 0.76            | 0.74            | 1.06            | 1.21           |
| combined average   | 130.65         | 96.06           | 109.00          |                 |                 |                |
| <b>16</b>          |                |                 |                 |                 |                 |                |
| ZADQOK             | 130.07         | 96.37           | 109.19          | 108.52          | 96.15           | 131.14         |
|                    |                | 95.35           | 107.94          | 108.83          | 95.08           |                |
| ECUMUK             | 129.44         | 93.54           | 108.04          | 107.65          | 92.13           | 129.81         |
|                    |                | 95.84           | 113.39          | 108.53          | 96.19           |                |

TABLE S1

| <b>Refcode</b>     | <b>ANGLES</b>  |                 |                 |                 |                 |                |
|--------------------|----------------|-----------------|-----------------|-----------------|-----------------|----------------|
|                    | <b>O-C1-C2</b> | <b>C1-C2-C3</b> | <b>C2-C3-C4</b> | <b>C3-C4-C5</b> | <b>C4-C5-C1</b> | <b>C5-C1-O</b> |
| <b>17</b>          |                |                 |                 |                 |                 |                |
| CIQSIE             | 132.62         | 99.34           | 103.88          | 104.48          | 98.73           | 129.13         |
|                    |                | 99.99           | 104.09          | 104.31          | 98.71           |                |
| FUVTEV             | 129.66         | 98.04           | 103.76          | 103.08          | 98.31           | 131.52         |
|                    |                | 98.72           | 103.28          | 103.94          | 98.65           |                |
| JUKSAJ             | 129.73         | 103.84          | 103.38          | 103.89          | 103.42          | 130.08         |
|                    |                | 96.53           | 103.85          | 103.54          | 96.51           |                |
| JUKSAJ             | 130.04         | 103.77          | 103.38          | 104.03          | 103.00          | 129.95         |
|                    |                | 96.95           | 103.74          | 103.73          | 96.78           |                |
| XAYGOT             | 129.82         | 103.12          | 103.82          | 103.81          | 103.59          | 130.45         |
|                    |                | 96.41           | 104.25          | 103.79          | 96.64           |                |
| averages           | 130.37         | 99.67           | 103.74          | 103.86          | 99.43           | 130.22         |
| standard deviation | 1.13           | 2.79            | 0.30            | 0.37            | 2.69            | 0.78           |
| combined average   | 130.30         | 99.55           | 103.80          |                 |                 |                |
| <b>18</b>          |                |                 |                 |                 |                 |                |
| BEVSOK             | 131.30         | 99.07           | 107.87          | 108.27          | 98.89           | 131.60         |
| BIVBUD20           | 132.73         | 100.48          | 107.44          | 108.51          | 99.43           | 132.63         |
| BIVBUD20           | 133.95         | 99.70           | 107.05          | 107.63          | 98.34           | 129.61         |
| DEPYEC             | 131.16         | 97.52           | 108.34          | 108.13          | 97.85           | 131.81         |
| DEPYOM             | 132.08         | 99.24           | 107.78          | 107.78          | 99.24           | 132.08         |
| DEYTOQ             | 133.05         | 100.58          | 108.01          | 107.96          | 100.06          | 130.29         |
| IBONUI             | 132.08         | 98.05           | 107.54          | 107.91          | 98.14           | 131.86         |
| IBOPAQ             | 130.11         | 97.19           | 108.08          | 107.83          | 96.82           | 133.26         |
| NILLUP             | 132.96         | 99.08           | 107.68          | 108.43          | 99.46           | 130.88         |
| PEWROY             | 132.80         | 100.30          | 107.79          | 108.21          | 100.50          | 129.59         |
| averages           | 132.22         | 99.12           | 107.76          | 108.07          | 98.87           | 131.36         |
| standard deviation | 1.06           | 1.15            | 0.34            | 0.28            | 1.04            | 1.18           |
| combined average   | 131.79         | 99.00           | 107.91          |                 |                 |                |

TABLE S1

| <b>Refcode</b>     | <b>DISTANCES</b> |              |              |              |              |              |
|--------------------|------------------|--------------|--------------|--------------|--------------|--------------|
|                    | <b>C1-O</b>      | <b>C1-C2</b> | <b>C2-C3</b> | <b>C3-C4</b> | <b>C4-C5</b> | <b>C1-C5</b> |
| <b>13</b>          |                  |              |              |              |              |              |
| BEMKUZ             | 1.202            | 1.537        | 1.501        | 1.320        | 1.506        | 1.537        |
| CEHBOG             | 1.208            | 1.532        | 1.505        | 1.333        | 1.502        | 1.512        |
| DONKIA             | 1.215            | 1.509        | 1.524        | 1.330        | 1.518        | 1.515        |
| DONKIA             | 1.217            | 1.519        | 1.526        | 1.333        | 1.514        | 1.505        |
| DONKIA10           | 1.214            | 1.508        | 1.523        | 1.329        | 1.517        | 1.515        |
| DONKIA10           | 1.216            | 1.518        | 1.524        | 1.332        | 1.513        | 1.504        |
| RUWRAC             | 1.212            | 1.534        | 1.499        | 1.367        | 1.499        | 1.539        |
| averages           | 1.212            | 1.522        | 1.515        | 1.335        | 1.510        | 1.518        |
| standard deviation | 0.005            | 0.011        | 0.011        | 0.014        | 0.007        | 0.013        |
| combined average   |                  | 1.520        | 1.512        |              |              |              |
| <b>14</b>          |                  |              |              |              |              |              |
| ACNPTH             | 1.191            | 1.548        | 1.503        | 1.347        | 1.497        | 1.543        |
| ACNPTH10           | 1.191            | 1.548        | 1.503        | 1.347        | 1.497        | 1.543        |
| BUDECN             | 1.200            | 1.540        | 1.517        | 1.323        | 1.524        | 1.521        |
| EBEQOR             | 1.207            | 1.513        | 1.515        | 1.333        | 1.527        | 1.546        |
| HAJMEK             | 1.202            | 1.515        | 1.523        | 1.341        | 1.503        | 1.516        |
| HAJMEK             | 1.201            | 1.513        | 1.528        | 1.337        | 1.519        | 1.526        |
| MEWYUI             | 1.214            | 1.529        | 1.522        | 1.335        | 1.509        | 1.525        |
| NKAUON             | 1.201            | 1.523        | 1.522        | 1.330        | 1.514        | 1.520        |
| averages           | 1.201            | 1.529        | 1.517        | 1.337        | 1.511        | 1.530        |
| standard deviation | 0.007            | 0.014        | 0.009        | 0.008        | 0.011        | 0.011        |
| combined average   |                  | 1.529        | 1.514        |              |              |              |
| <b>15</b>          |                  |              |              |              |              |              |
| BIYWAH             | 1.203            | 1.535        | 1.512        | 1.324        | 1.511        | 1.531        |
| CIQVAZ             | 1.200            | 1.521        | 1.499        | 1.326        | 1.490        | 1.520        |
| DITMOI             | 1.198            | 1.532        | 1.545        | 1.355        | 1.527        | 1.542        |
| ETHPTB             | 1.200            | 1.531        | 1.529        | 1.344        | 1.534        | 1.512        |
| HOXJIN             | 1.199            | 1.548        | 1.527        | 1.321        | 1.517        | 1.551        |
| JITMEE             | 1.204            | 1.515        | 1.500        | 1.318        | 1.494        | 1.527        |
| JITNIJ             | 1.197            | 1.526        | 1.500        | 1.325        | 1.503        | 1.521        |
| KAFBEY             | 1.199            | 1.532        | 1.537        | 1.338        | 1.483        | 1.526        |
| KUBDAM             | 1.205            | 1.567        | 1.502        | 1.352        | 1.514        | 1.532        |
| PIGSED             | 1.200            | 1.528        | 1.537        | 1.350        | 1.527        | 1.534        |
| TIBGUG             | 1.203            | 1.544        | 1.525        | 1.336        | 1.514        | 1.542        |
| ZEBXOT             | 1.196            | 1.539        | 1.540        | 1.351        | 1.526        | 1.544        |
| averages           | 1.200            | 1.535        | 1.521        | 1.337        | 1.512        | 1.532        |
| standard deviation | 0.003            | 0.013        | 0.017        | 0.013        | 0.016        | 0.011        |
| combined average   |                  | 1.533        | 1.516        |              |              |              |
| <b>16</b>          |                  |              |              |              |              |              |
| ZADQOK             | 1.191            | 1.562        | 1.536        | 1.368        | 1.541        | 1.551        |
|                    |                  |              | 1.536        | 1.393        | 1.541        |              |
| ECUMUK             | 1.197            | 1.540        | 1.559        | 1.432        | 1.570        | 1.567        |
|                    |                  |              | 1.511        | 1.338        | 1.583        |              |



TABLE S1

| <b>Refcode</b>     | <b>DISTANCES</b> |              |              |              |              |              |
|--------------------|------------------|--------------|--------------|--------------|--------------|--------------|
|                    | <b>C1-O</b>      | <b>C1-C2</b> | <b>C2-C3</b> | <b>C3-C4</b> | <b>C4-C5</b> | <b>C1-C5</b> |
| <b>17</b>          |                  |              |              |              |              |              |
| CIQSIE             | 1.193            | 1.506        | 1.527        | 1.550        | 1.532        | 1.535        |
|                    |                  |              | 1.521        | 1.552        | 1.527        |              |
| FUVTEV             | 1.217            | 1.514        | 1.537        | 1.571        | 1.549        | 1.498        |
|                    |                  |              | 1.537        | 1.562        | 1.542        |              |
| JUKSAJ             | 1.214            | 1.522        | 1.533        | 1.586        | 1.531        | 1.524        |
|                    |                  |              | 1.550        | 1.575        | 1.550        |              |
| JUKSAJ             | 1.214            | 1.524        | 1.530        | 1.590        | 1.537        | 1.529        |
|                    |                  |              | 1.547        | 1.581        | 1.551        |              |
| XAYGOT             | 1.210            | 1.526        | 1.532        | 1.577        | 1.538        | 1.525        |
|                    |                  |              | 1.548        | 1.562        | 1.544        |              |
| averages           | 1.210            | 1.518        | 1.536        | 1.571        | 1.540        | 1.522        |
| standard deviation | 0.009            | 0.007        | 0.009        | 0.013        | 0.008        | 0.013        |
| combined average   |                  | 1.520        | 1.538        |              |              |              |
| <b>18</b>          |                  |              |              |              |              |              |
| BEVSOK             | 1.312            | 1.517        | 1.530        | 1.322        | 1.526        | 1.515        |
| BIVBUD20           | 1.315            | 1.532        | 1.520        | 1.342        | 1.513        | 1.566        |
| BIVBUD20           | 1.339            | 1.501        | 1.544        | 1.339        | 1.542        | 1.533        |
| DEPYEC             | 1.328            | 1.521        | 1.517        | 1.331        | 1.518        | 1.524        |
| DEPYOM             | 1.306            | 1.526        | 1.510        | 1.341        | 1.510        | 1.526        |
| DEYTOQ             | 1.323            | 1.522        | 1.509        | 1.334        | 1.517        | 1.523        |
| IBONUI             | 1.316            | 1.515        | 1.526        | 1.320        | 1.519        | 1.520        |
| IBOPAQ             | 1.320            | 1.514        | 1.521        | 1.315        | 1.526        | 1.523        |
| NILLUP             | 1.329            | 1.517        | 1.510        | 1.319        | 1.509        | 1.515        |
| PEWROY             | 1.321            | 1.520        | 1.514        | 1.320        | 1.515        | 1.511        |
| averages           | 1.321            | 1.519        | 1.520        | 1.328        | 1.520        | 1.526        |
| standard deviation | 0.009            | 0.008        | 0.010        | 0.010        | 0.009        | 0.015        |
| combined average   |                  | 1.522        | 1.520        |              |              |              |

TABLE S1

| Refcode            | TORSIONS        |                   |                 |                   |                |                   |                |                   |
|--------------------|-----------------|-------------------|-----------------|-------------------|----------------|-------------------|----------------|-------------------|
|                    | C1-C2-<br>C5-C4 | absolute<br>value | C1-C5-<br>C2-C4 | absolute<br>value | O-C2-<br>C5-C4 | absolute<br>value | O-C5-<br>C2-C4 | absolute<br>value |
| <b>13</b>          |                 |                   |                 |                   |                |                   |                |                   |
| BEMKUZ             | 178.35          | 178.35            | -179.02         | 179.02            | -179.20        | 179.20            | 178.53         | 178.53            |
| CEHBOG             | 163.13          | 163.13            | -165.04         | 165.04            | -164.91        | 164.91            | 163.00         | 163.00            |
| DONKIA             | -173.93         | 173.93            | 173.58          | 173.58            | 173.40         | 173.40            | -173.76        | 173.76            |
| DONKIA             | -171.19         | 171.19            | 170.75          | 170.75            | 170.67         | 170.67            | -171.10        | 171.10            |
| DONKIA10           | -173.93         | 173.93            | 173.58          | 173.58            | 173.40         | 173.40            | -173.76        | 173.76            |
| DONKIA10           | -171.18         | 171.18            | 170.75          | 170.75            | 170.66         | 170.66            | -171.10        | 171.10            |
| RUWRAC             | 179.24          | 179.24            | -177.93         | 177.93            | -177.83        | 177.83            | 179.14         | 179.14            |
| averages           | -24.22          | 172.99            | 23.81           | 172.95            | 23.74          | 172.87            | -24.15         | 172.91            |
| standard deviation |                 | 4.98              |                 | 4.39              |                | 4.45              |                | 5.02              |
| combined average   |                 | 172.97            |                 |                   |                | 172.89            |                |                   |
| <b>14</b>          |                 |                   |                 |                   |                |                   |                |                   |
| ACNPTH             | -145.66         | 145.66            | 145.09          | 145.09            | 143.51         | 143.51            | -144.08        | 144.08            |
| ACNPTH10           | -145.66         | 145.66            | 145.09          | 145.09            | 143.51         | 143.51            | -144.08        | 144.08            |
| BUDECN             | -138.99         | 138.99            | 138.83          | 138.83            | 139.03         | 139.03            | -139.19        | 139.19            |
| EBEQOR             | -139.52         | 139.52            | 139.07          | 139.07            | 139.36         | 139.36            | 138.92         | 138.92            |
| HJMEK              | -147.01         | 147.01            | 148.27          | 148.27            | 147.51         | 147.51            | -146.26        | 146.26            |
| HJMEK              | 145.84          | 145.84            | -147.07         | 147.07            | -146.48        | 146.48            | 145.26         | 145.26            |
| MEWYUI             | 152.77          | 152.77            | 154.26          | 154.26            | 152.37         | 152.37            | -153.87        | 153.87            |
| NKAUON             | -140.70         | 140.70            | 139.69          | 139.69            | 139.58         | 139.58            | -140.59        | 140.59            |
| averages           | -69.87          | 144.52            | 107.90          | 144.67            | 107.30         | 143.92            | -72.99         | 144.03            |
| standard deviation |                 | 4.31              |                 | 5.02              |                | 4.40              |                | 4.54              |
| combined average   |                 | 144.59            |                 |                   |                | 143.98            |                |                   |
| <b>15</b>          |                 |                   |                 |                   |                |                   |                |                   |
| BIYWAH             | 123.96          | 123.96            | -124.36         | 124.36            | -119.64        | 119.64            | 119.25         | 119.25            |
| CIQVAZ             | 123.73          | 123.73            | -123.40         | 123.40            | -121.99        | 121.99            | 122.32         | 122.32            |
| DITMOI             | -127.36         | 127.36            | 126.03          | 126.03            | 127.39         | 127.39            | -128.73        | 128.73            |
| ETHPTB             | -124.97         | 124.97            | 125.63          | 125.63            | 125.77         | 125.77            | -125.11        | 125.11            |
| HOXJIN             | 125.96          | 125.96            | -125.48         | 125.48            | -124.57        | 124.57            | 125.04         | 125.04            |
| JITMEE             | 126.34          | 126.34            | -126.49         | 126.49            | -127.47        | 127.47            | 127.31         | 127.31            |
| JITNIJ             | -126.14         | 126.14            | 126.40          | 126.40            | -126.81        | 126.81            | 127.07         | 127.07            |
| KAFBEY             | -126.22         | 126.22            | 125.53          | 125.53            | 126.10         | 126.10            | -126.79        | 126.79            |
| KUBDAM             | -125.88         | 125.88            | 125.05          | 125.05            | 124.77         | 124.77            | -125.59        | 125.59            |
| PIGSED             | 123.38          | 123.38            | -122.84         | 122.84            | -121.49        | 121.49            | 122.03         | 122.03            |
| TIBGUG             | 121.79          | 121.79            | -122.09         | 122.09            | -120.40        | 120.40            | 120.10         | 120.10            |
| ZEBXOT             | -124.34         | 124.34            | 123.20          | 123.20            | 122.14         | 122.14            | -123.29        | 123.29            |
| averages           | -0.81           | 125.00            | 0.60            | 124.71            | -19.68         | 124.05            | 19.47          | 124.39            |
| standard deviation |                 | 1.52              |                 | 1.43              |                | 2.67              |                | 2.87              |
| combined average   |                 | 124.86            |                 |                   |                | 124.22            |                |                   |
| <b>16</b>          |                 |                   |                 |                   |                |                   |                |                   |
| ZADQOK             | -125.68         | 125.68            | 124.63          | 124.63            | 125.08         | 125.08            | -126.12        | 126.12            |
|                    | 122.16          | 122.16            | -122.49         | 122.49            | -122.04        | 122.04            | 121.71         | 121.71            |
| ECUMUK             | 128.24          | 128.24            | 127.37          | 127.37            | 129.44         | 129.44            | 128.57         | 128.57            |
|                    | -117.36         | 117.36            | -118.77         | 118.77            | 116.16         | 116.16            | 117.57         | 117.57            |

TABLE S1

## TORSIONS

| <b>Refcode</b>     | <b>C1-C2-<br/>C5-C4</b> | <b>absolute<br/>value</b> | <b>C1-C5-<br/>C2-C4</b> | <b>absolute<br/>value</b> | <b>O-C2-<br/>C5-C4</b> | <b>absolute<br/>value</b> | <b>O-C5-<br/>C2-C4</b> | <b>absolute<br/>value</b> |
|--------------------|-------------------------|---------------------------|-------------------------|---------------------------|------------------------|---------------------------|------------------------|---------------------------|
| <b>17</b>          |                         |                           |                         |                           |                        |                           |                        |                           |
| CIQSIE             | -123.12                 | 123.12                    | 122.22                  | 122.22                    | -123.10                | 123.10                    | 122.20                 | 122.20                    |
|                    | 122.90                  | 122.90                    | -123.65                 | 123.65                    | 122.92                 | 122.92                    | -123.67                | 123.67                    |
| FUVTEV             | -120.26                 | 120.26                    | 120.14                  | 120.14                    | -119.75                | 119.75                    | 119.63                 | 119.63                    |
|                    | 121.60                  | 121.60                    | -121.23                 | 121.23                    | 122.11                 | 122.11                    | -121.73                | 121.73                    |
| JUKSAJ             | 130.64                  | 130.64                    | -131.00                 | 131.00                    | 136.35                 | 136.35                    | -136.71                | 136.71                    |
|                    | -117.40                 | 117.40                    | 117.70                  | 117.70                    | -111.69                | 111.69                    | 111.99                 | 111.99                    |
| JUKSAJ             | 130.52                  | 130.52                    | -130.55                 | 130.55                    | 135.66                 | 135.66                    | -135.68                | 135.68                    |
|                    | -118.32                 | 118.32                    | 118.23                  | 118.23                    | -113.18                | 113.18                    | 113.10                 | 113.10                    |
| XAYGOT             | 131.25                  | 131.25                    | -129.83                 | 129.83                    | 136.30                 | 136.30                    | -134.89                | 134.89                    |
|                    | -117.81                 | 117.81                    | 118.13                  | 118.13                    | -112.76                | 112.76                    | 113.07                 | 113.07                    |
| averages           | 4.00                    | 123.38                    | -3.98                   | 123.27                    | 7.29                   | 123.38                    | -7.27                  | 123.27                    |
| standard deviation |                         | 5.21                      |                         | 5.04                      |                        | 9.24                      |                        | 9.06                      |
| combined average   |                         | 123.32                    |                         |                           |                        | 123.32                    |                        |                           |
| <b>18</b>          |                         |                           |                         |                           |                        |                           |                        |                           |
| BEVSOK             | 127.86                  | 127.86                    | -128.22                 | 128.22                    | 129.59                 | 129.59                    | -129.94                | 129.94                    |
| BIVBUD20           | 128.30                  | 128.30                    | -128.34                 | 128.34                    | 128.31                 | 128.31                    | -128.35                | 128.35                    |
| BIVBUD20           | 126.06                  | 126.06                    | -126.90                 | 126.90                    | 128.08                 | 128.08                    | -128.93                | 128.93                    |
| DEPYEC             | -126.18                 | 126.18                    | 125.49                  | 125.49                    | -125.85                | 125.85                    | 125.16                 | 125.16                    |
| DEPYOM             | 127.31                  | 127.31                    | -127.31                 | 127.31                    | 126.21                 | 126.21                    | -126.21                | 126.21                    |
| DEYTOQ             | -129.91                 | 129.91                    | 130.32                  | 130.32                    | -132.78                | 132.78                    | 133.19                 | 133.19                    |
| IBONUI             | 124.96                  | 124.96                    | -124.80                 | 124.80                    | 121.63                 | 121.63                    | -121.46                | 121.46                    |
| IBOPAQ             | 123.29                  | 123.29                    | -123.51                 | 123.51                    | 119.33                 | 119.33                    | -119.55                | 119.55                    |
| NILLUP             | -128.79                 | 128.79                    | 127.43                  | 127.43                    | -128.19                | 128.19                    | 126.83                 | 126.83                    |
| PEWROY             | -130.57                 | 130.57                    | 130.04                  | 130.04                    | -135.88                | 135.88                    | 135.35                 | 135.35                    |
| averages           | 24.23                   | 127.32                    | -24.58                  | 127.24                    | 23.05                  | 127.58                    | -23.39                 | 127.50                    |
| standard deviation |                         | 2.13                      |                         | 2.07                      |                        | 4.58                      |                        | 4.58                      |
| combined average   |                         | 127.28                    |                         |                           |                        | 127.54                    |                        |                           |

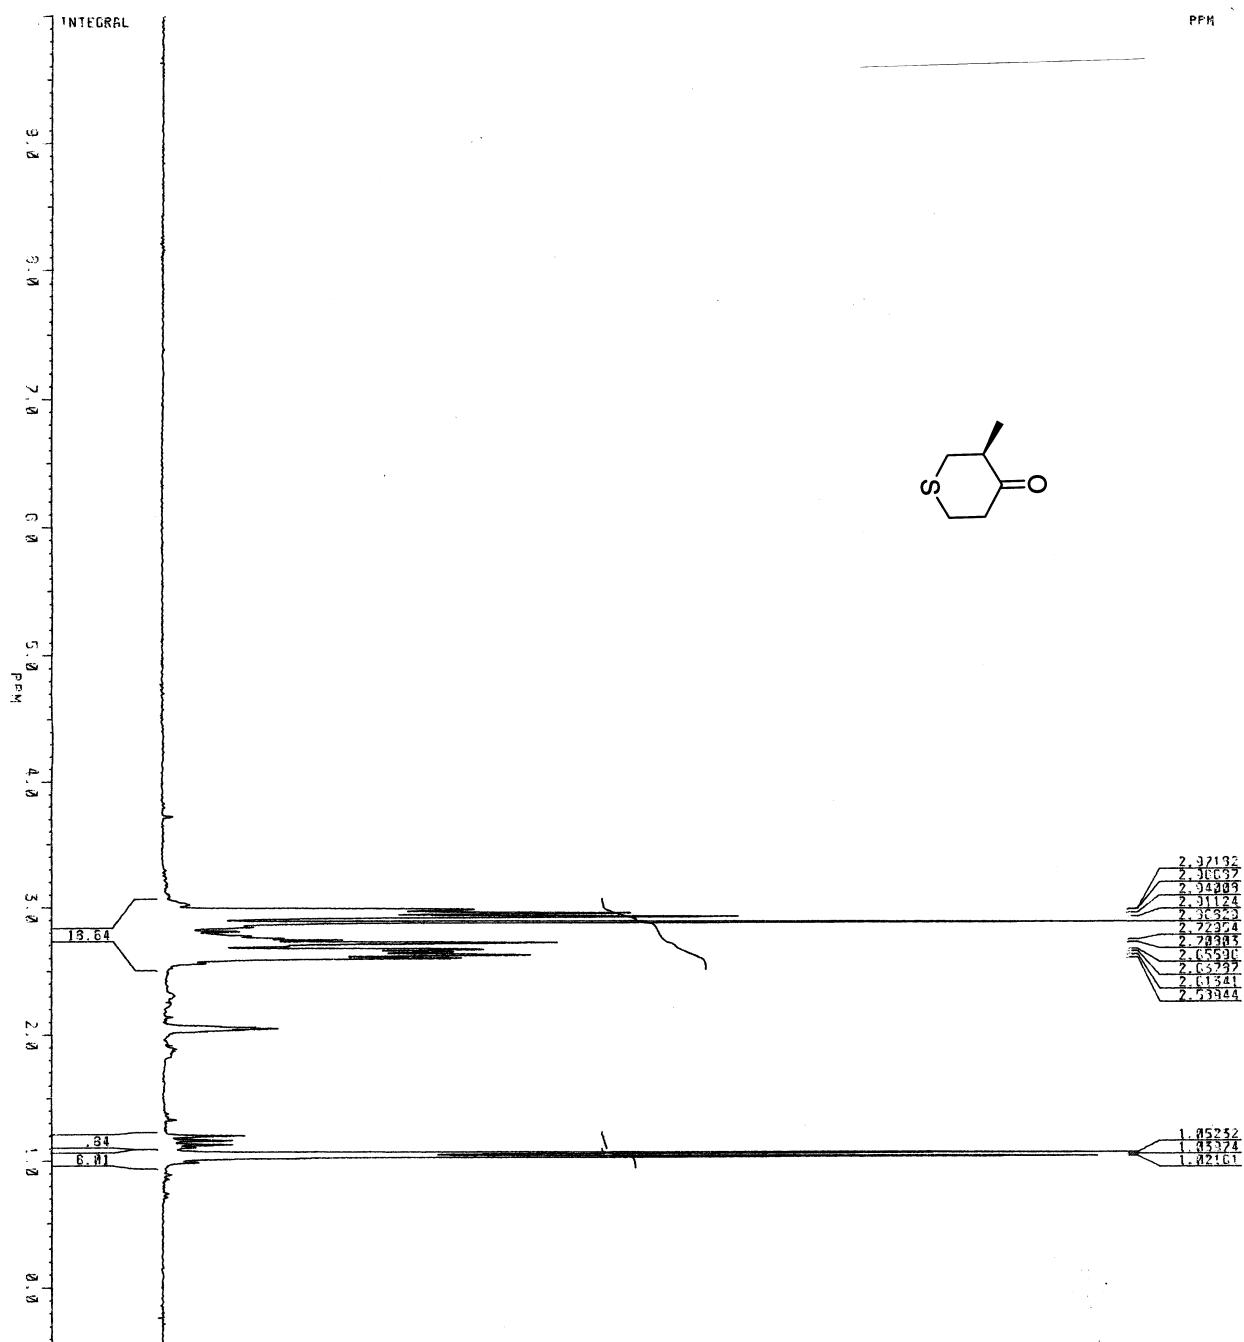



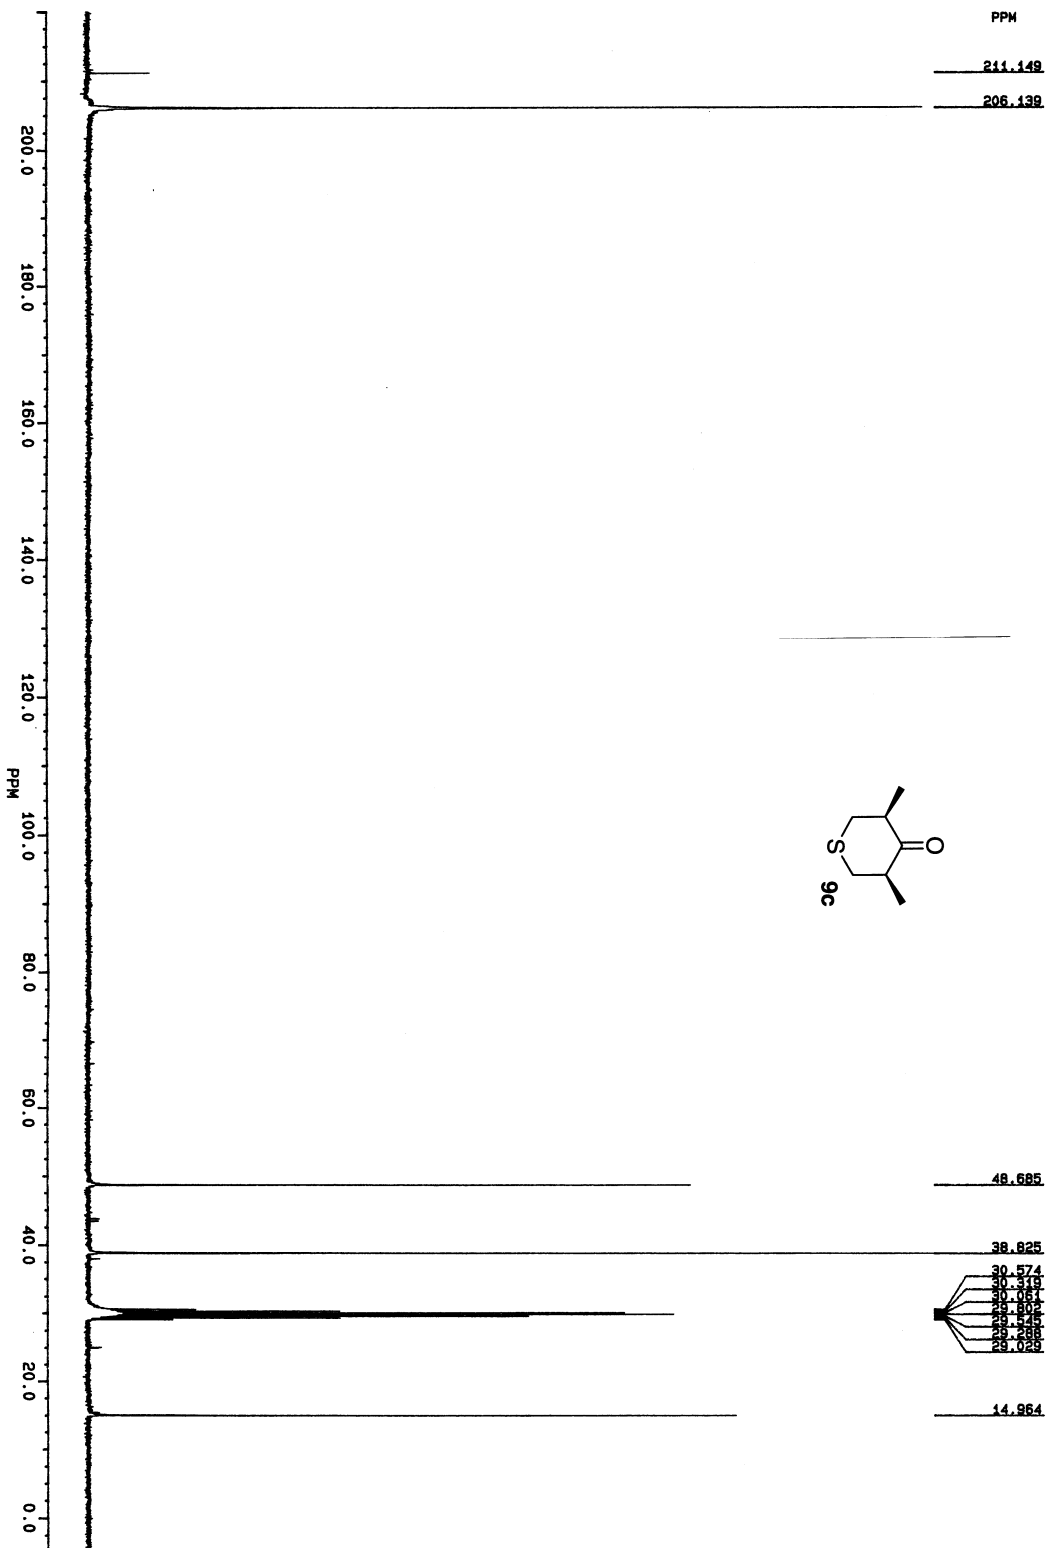

~~BIOX-R~~  
 BNC0709.001  
 AU PROE:  
 LTAGATE. AUR  
 DATE 9-7-94  
 SF 75.469  
 SY 75.0  
 O1 4061.664  
 S1 85936  
 SD 85936  
 SM 29411.765  
 HZ/PT .898  
 PM 4.4  
 RD 0.0  
 AG 1.114  
 RG 320  
 NS 18277  
 TE 297  
 FW 36800  
 O2 4430.000  
 DP 15H CPD  
 LB .900  
 BR 0.0  
 CX 36.50  
 CY 21.00  
 F1 220.00P  
 HZ/CM 465.184P  
 PM/CM 465.184  
 SR -1075.71

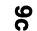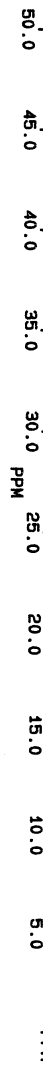

IN .0001923





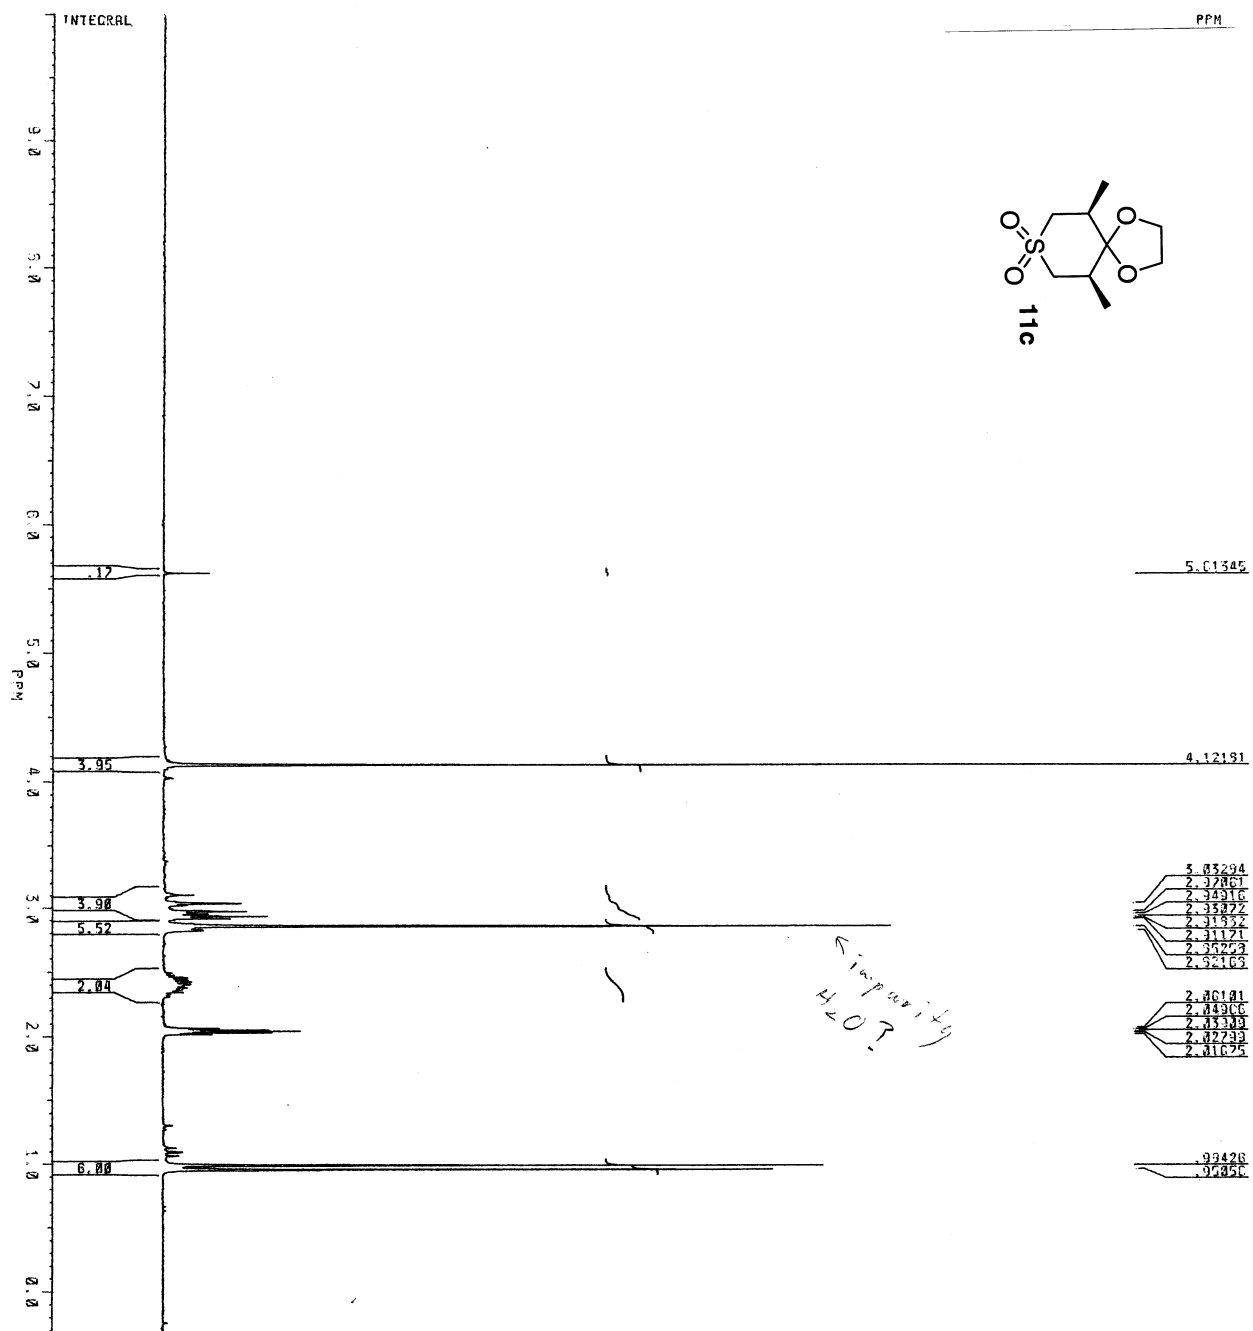

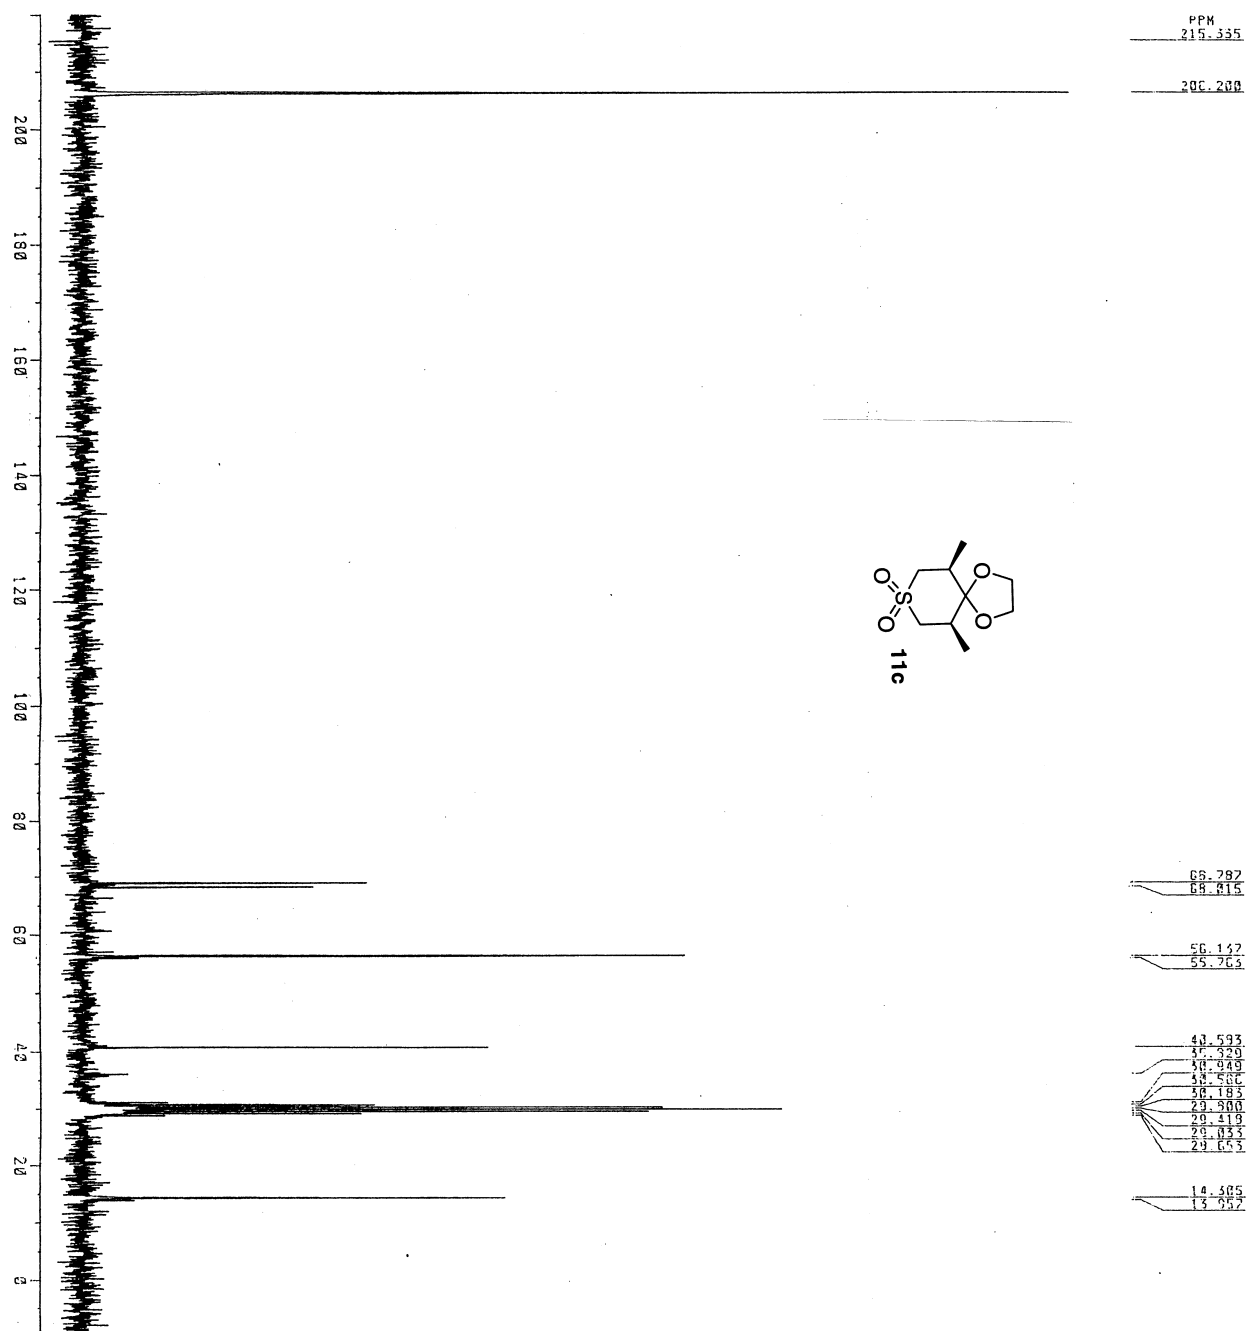

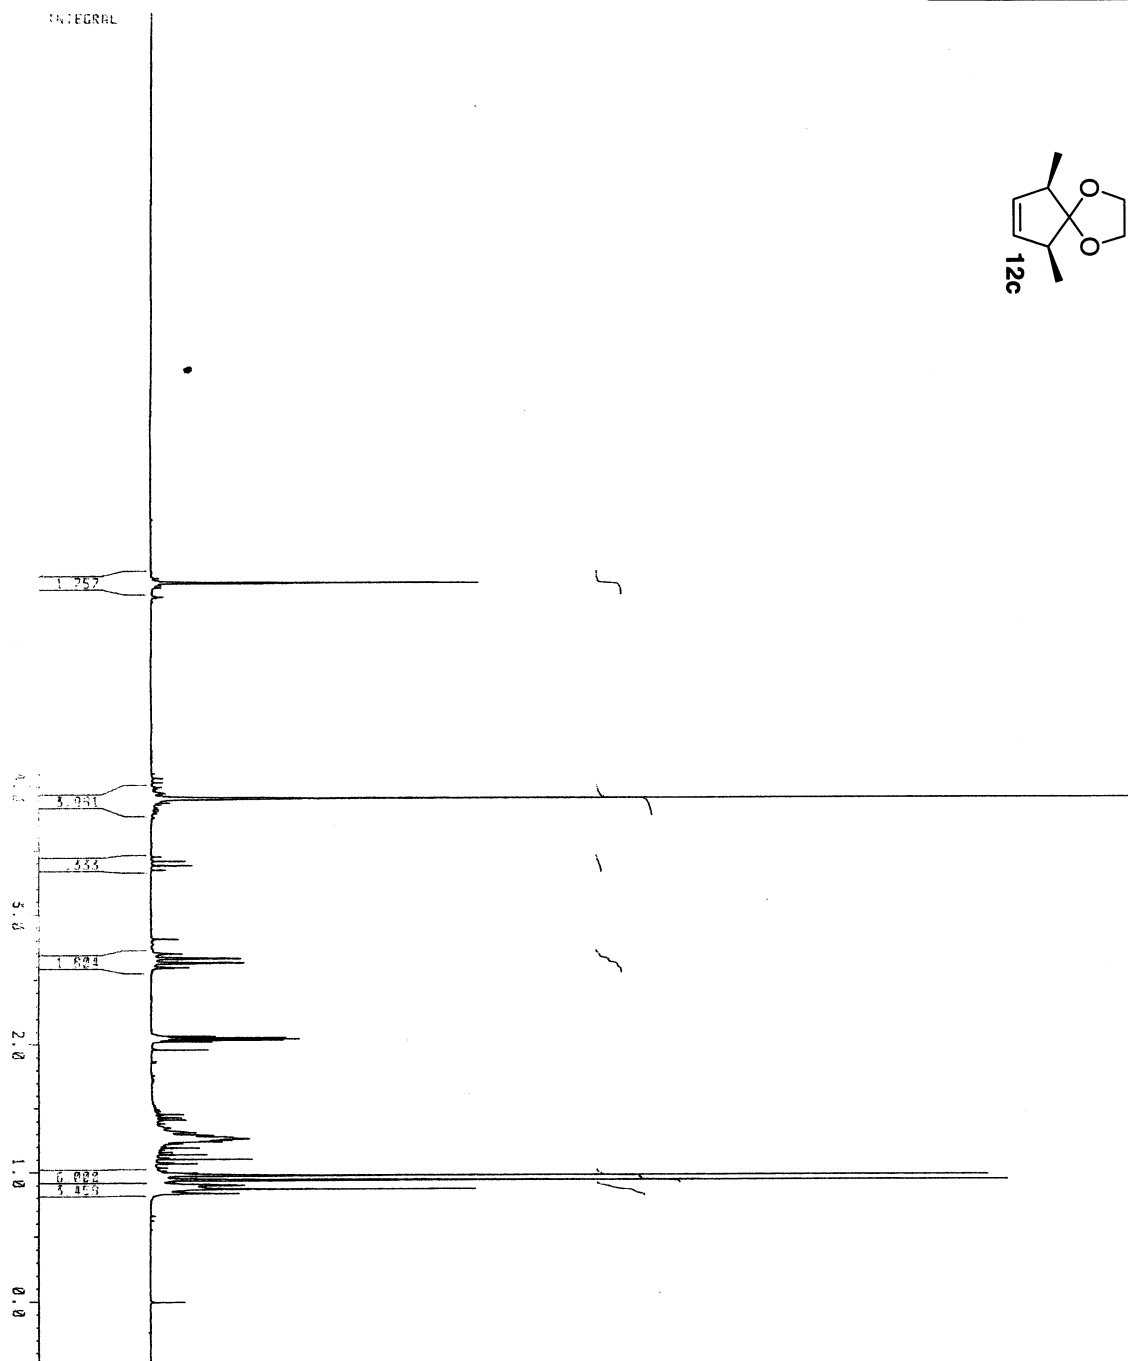

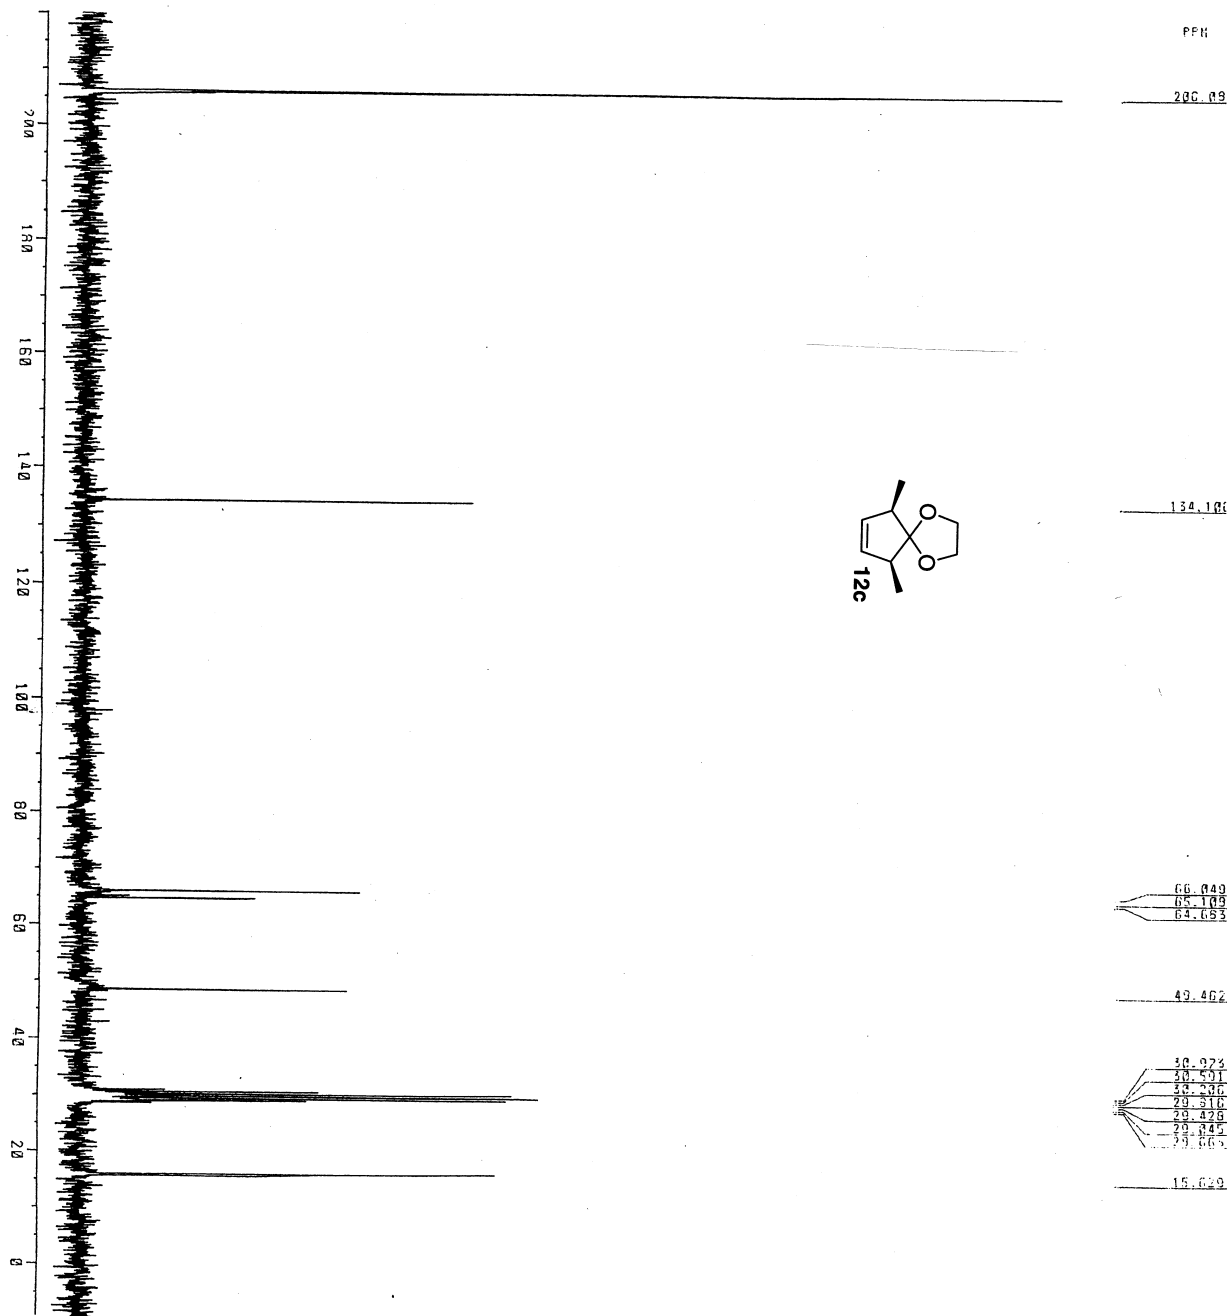

EX-1000

RAJ328.001

AU PROG:

POWCATE-AU

DATE 29-3-94

SF 50.33

ST 50.32700

O1 1606.06

SI 16384

TD 16384

SW 19285.71

HZ/PI 1.74

PW 6.4

RO 0.0

AO 57

RG 640

NS 105

TE 297

FW 17900

O2 3215.02

DP 16H P0

LB 1.72

GB 0.0

CX 30.02

CY 22.00

F1 220.01

F2 -9.98

HZ/CM 385.80

PR/CM 7.66

SR -3465.07

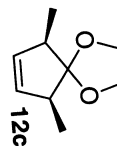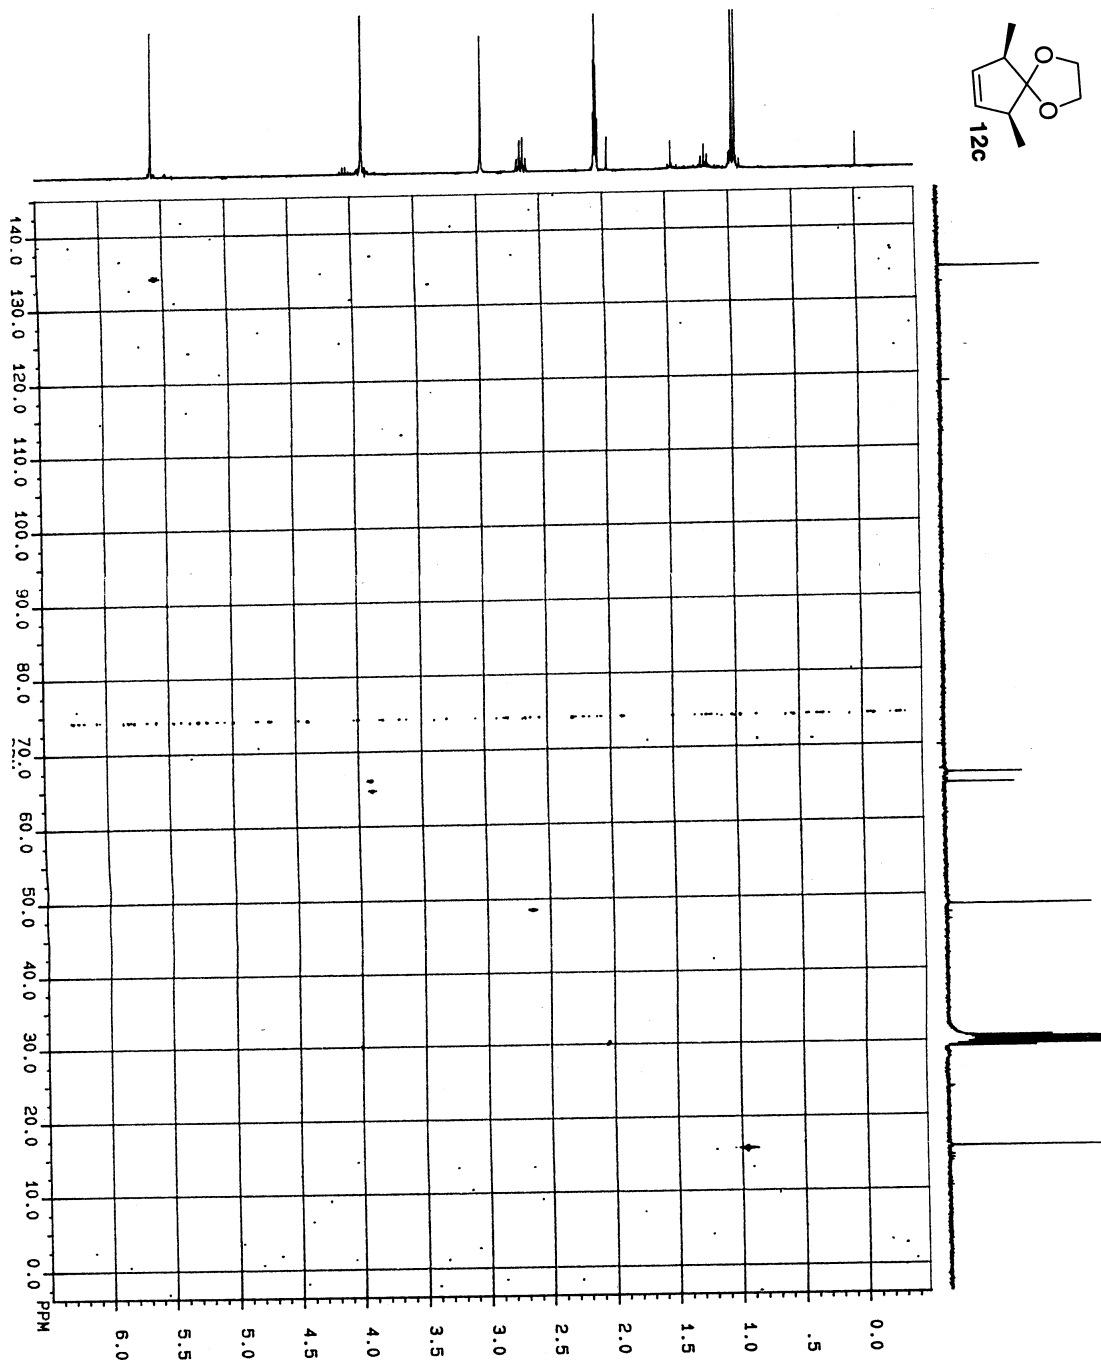

BXI-ER  
 BNX:SMX  
 F1:PROJ:  
 F2:PROJ:  
 F2:PROJ:  
 AU:CHORD: AU  
 DATE: 28-2-95  
 ST1: 2048  
 SM1: 1024  
 SM2: 1157.907  
 SM4: 1350.174  
 ND0: 2  
 ND1: 6  
 ND2: 6  
 LB1: 11.355  
 LB2: 2.657  
 GB1: 0.0  
 GB2: 0.0  
 MC2: M  
 PLIM ROW: 145.033P  
 F1: -3.776P  
 F2: 6.496P  
 AND COLUMN: 6.479P  
 F1: -4.79P  
 F2: -4.79P  
 D1: 1.0000000  
 S1: OH  
 P1: 16.20  
 D0: .0000030  
 D3: .0035000  
 P2: 32.40  
 P3: 8.70  
 P4: 4.40  
 D4: .0017500  
 S2: 15H  
 RD: 0.0  
 PM: 0.0  
 DE: 56.30  
 NS: 96  
 DS: 2  
 P9: 130.00  
 NE: 512  
 IN: .0001638



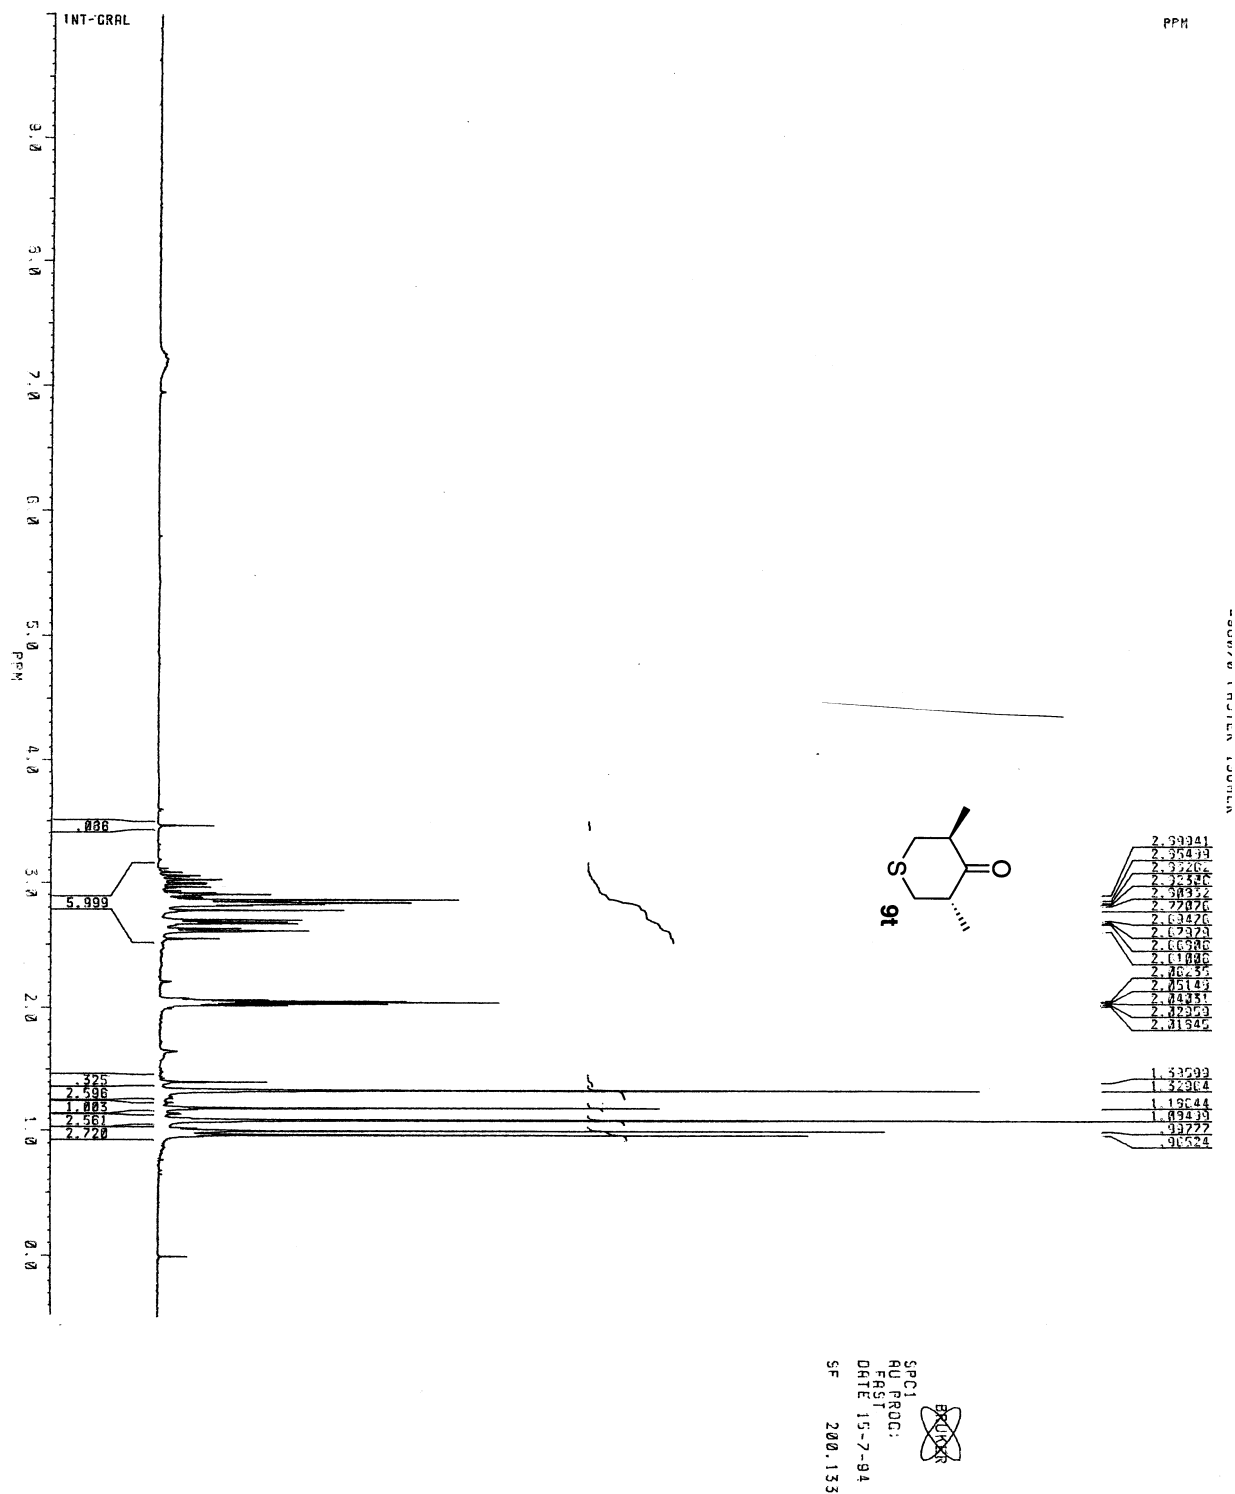

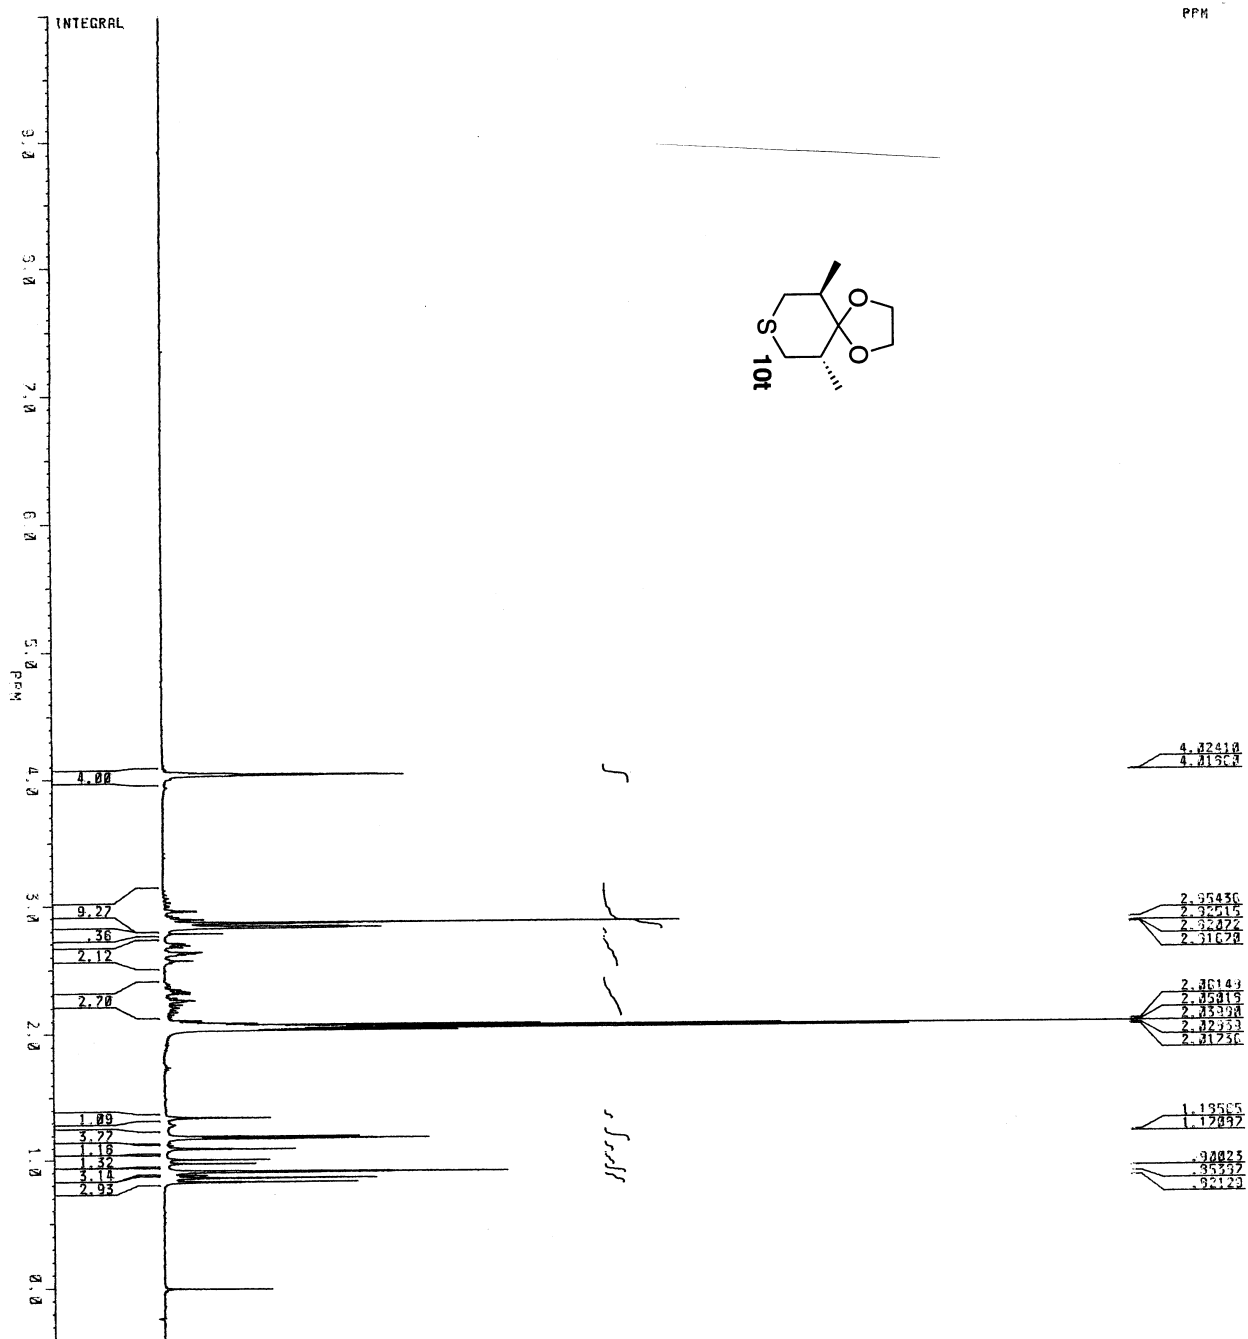



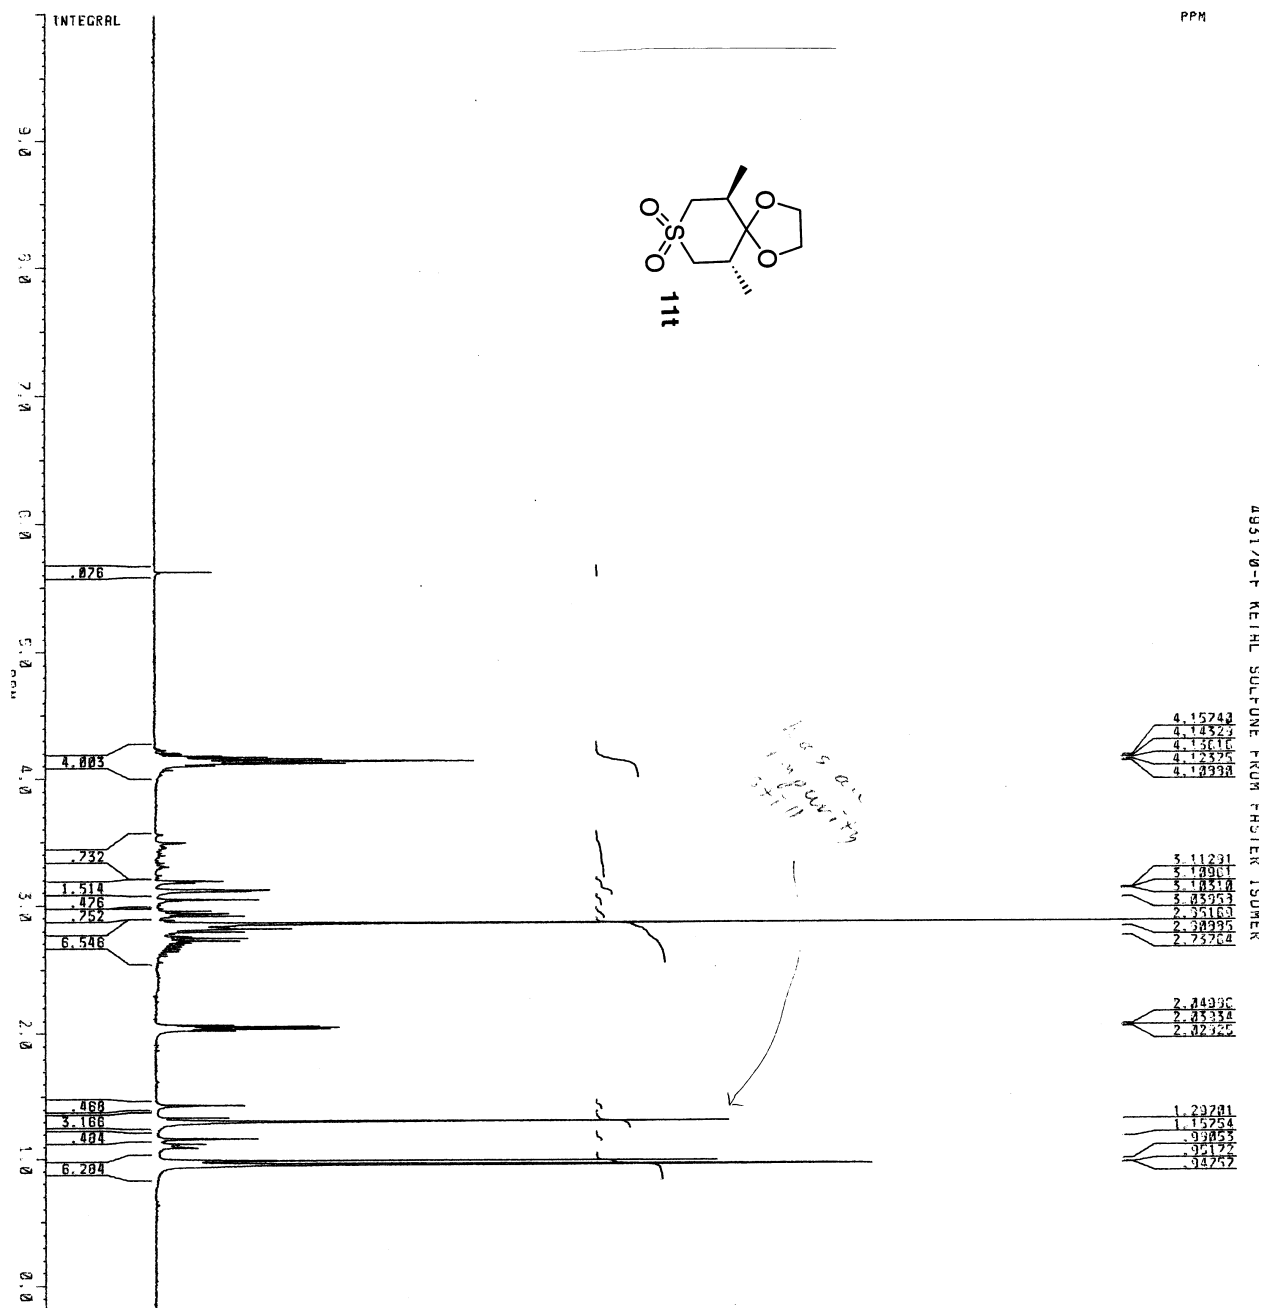

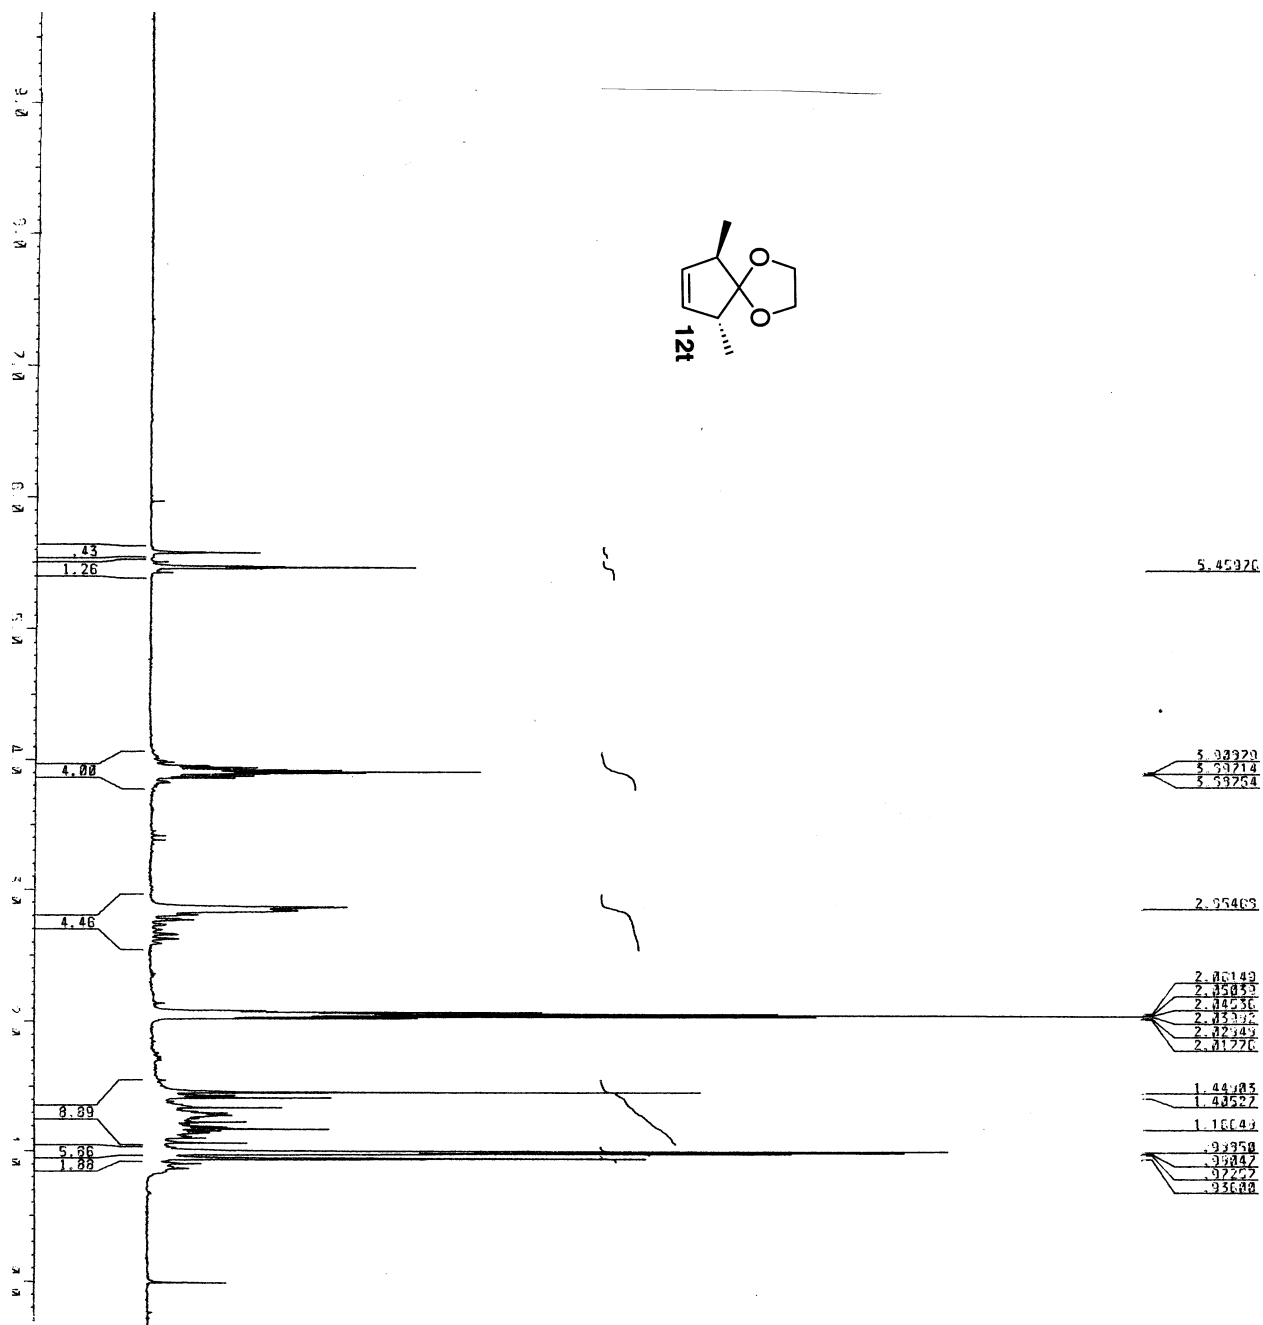

Supplement: Supplementary file 1 [file 5740317]
